# Supplementary material for: Sepsis—A Retrospective Cohort Study of Bloodstream Infections
Source: PubMed Central journal article supplement (PMC7760988; doi:10.3390/antibiotics9120851), 2020-11-28
Supplement: antibiotics-09-00851-s001.pdf [file antibiotics-09-00851-s001.pdf]

| YEAR                                               | 2015        |                  | 2016        |                  | 2017        |                  | 2018        |                  | 2019        |                  |
|----------------------------------------------------|-------------|------------------|-------------|------------------|-------------|------------------|-------------|------------------|-------------|------------------|
|                                                    | n. patients | percentage value | n. patients | percentage value | n. patients | percentage value | n. patients | percentage value | n. patients | percentage value |
| ISOLATED SPECIES                                   |             |                  |             |                  |             |                  |             |                  |             |                  |
| <i>Staphylococcus epidermidis</i>                  | 114         | 16.38%           | 139         | 18.94%           | 150         | 17.88%           | 133         | 15.32%           | 149         | 18.35%           |
| <i>Escherichia coli</i>                            | 73          | 10.49%           | 74          | 10.08%           | 110         | 13.11%           | 87          | 10.02%           | 87          | 10.71%           |
| <i>Klebsiella pneumoniae</i>                       | 65          | 9.34%            | 65          | 8.86%            | 63          | 7.51%            | 91          | 10.48%           | 27          | 3.33%            |
| <i>Staphylococcus aureus</i>                       | 57          | 8.19%            | 103         | 14.03%           | 91          | 10.85%           | 158         | 18.20%           | 103         | 12.68%           |
| <i>Staphylococcus hominis</i>                      | 53          | 7.61%            | 57          | 7.77%            | 68          | 8.10%            | 52          | 5.99%            | 45          | 5.54%            |
| <i>Enterococcus faecalis</i>                       | 48          | 6.90%            | 37          | 5.04%            | 44          | 5.24%            | 49          | 5.65%            | 44          | 5.42%            |
| <i>Staphylococcus haemolyticus</i>                 | 46          | 6.61%            | 66          | 8.99%            | 65          | 7.75%            | 49          | 5.65%            | 53          | 6.53%            |
| <i>Acinetobacter baumannii</i>                     | 39          | 5.60%            | 31          | 4.22%            | 49          | 5.84%            | 54          | 6.22%            | 29          | 3.57%            |
| <i>Proteus mirabilis</i>                           | 24          | 3.45%            | 10          | 1.36%            | 20          | 2.38%            | 7           | 0.81%            | 14          | 1.72%            |
| <i>Pseudomonas aeruginosa</i>                      | 24          | 3.45%            | 29          | 3.95%            | 10          | 1.19%            | 23          | 2.65%            | 34          | 4.19%            |
| <i>Candida albicans</i>                            | 19          | 2.73%            | 9           | 1.23%            | 14          | 1.67%            | 13          | 1.50%            | 17          | 2.09%            |
| <i>Enterococcus faecium</i>                        | 15          | 2.16%            | 12          | 1.63%            | 17          | 2.03%            | 25          | 2.88%            | 14          | 1.72%            |
| <i>Enterobacter Cloacae</i>                        | 14          | 2.01%            | 9           | 1.23%            | 8           | 0.95%            | 14          | 1.61%            | 9           | 1.11%            |
| <i>Candida parapsilosis</i>                        | 13          | 1.87%            | 8           | 1.09%            | 7           | 0.83%            | 0           | 0.00%            | 11          | 1.35%            |
| <i>Staphylococcus capitis</i>                      | 11          | 1.58%            | 14          | 1.91%            | 11          | 1.31%            | 5           | 0.58%            | 19          | 2.34%            |
| <i>Staphylococcus warneri</i>                      | 8           | 1.15%            | 6           | 0.82%            | 6           | 0.72%            | 3           | 0.35%            | 4           | 0.49%            |
| <i>Candida glabrata</i>                            | 6           | 0.86%            | 0           | 0.00%            | 4           | 0.48%            | 2           | 0.23%            | 1           | 0.12%            |
| <i>Serratia marcescens</i>                         | 5           | 0.72%            | 5           | 0.68%            | 7           | 0.83%            | 8           | 0.92%            | 6           | 0.74%            |
| <i>Staphylococcus simulans</i>                     | 5           | 0.72%            | 4           | 0.54%            | 4           | 0.48%            | 11          | 1.27%            | 3           | 0.37%            |
| <i>Enterobacter aerogenes</i>                      | 4           | 0.57%            | 0           | 0.00%            | 1           | 0.12%            | 3           | 0.35%            | 0           | 0.00%            |
| <i>Providencia stuartii</i>                        | 4           | 0.57%            | 3           | 0.41%            | 14          | 1.67%            | 9           | 1.04%            | 1           | 0.12%            |
| <i>Staphylococcus auricularis</i>                  | 4           | 0.57%            | 2           | 0.27%            | 2           | 0.24%            | 1           | 0.12%            | 0           | 0.00%            |
| <i>Candida tropicalis</i>                          | 3           | 0.43%            | 1           | 0.14%            | 3           | 0.36%            | 0           | 0.00%            | 5           | 0.62%            |
| <i>Enterococcus avium</i>                          | 3           | 0.43%            | 1           | 0.14%            | 0           | 0.00%            | 0           | 0.00%            | 1           | 0.12%            |
| <i>Stenotrophomonas maltophilia</i>                | 3           | 0.43%            | 3           | 0.41%            | 7           | 0.83%            | 3           | 0.35%            | 2           | 0.25%            |
| <i>Streptococcus gordonii</i>                      | 3           | 0.43%            | 1           | 0.14%            | 2           | 0.24%            | 0           | 0.00%            | 1           | 0.12%            |
| <i>Streptococcus mitis</i>                         | 3           | 0.43%            | 5           | 0.68%            | 2           | 0.24%            | 2           | 0.23%            | 4           | 0.49%            |
| <i>Streptococcus pneumoniae</i>                    | 3           | 0.43%            | 1           | 0.14%            | 2           | 0.24%            | 5           | 0.58%            | 0           | 0.00%            |
| <i>Citrobacter koseri</i>                          | 2           | 0.29%            | 0           | 0.00%            | 1           | 0.12%            | 8           | 0.92%            | 12          | 1.48%            |
| <i>Klebsiella oxytoca</i>                          | 2           | 0.29%            | 1           | 0.14%            | 3           | 0.36%            | 2           | 0.23%            | 9           | 1.11%            |
| <i>Morganella morganii</i>                         | 2           | 0.29%            | 4           | 0.54%            | 1           | 0.12%            | 1           | 0.12%            | 3           | 0.37%            |
| <i>Pseudomonas fluorescens</i>                     | 2           | 0.29%            | 3           | 0.41%            | 0           | 0.00%            | 0           | 0.00%            | 0           | 0.00%            |
| <i>Salmonella ser. Typhi</i>                       | 2           | 0.29%            | 0           | 0.00%            | 0           | 0.00%            | 0           | 0.00%            | 0           | 0.00%            |
| <i>Staphylococcus lugdunensis</i>                  | 2           | 0.29%            | 0           | 0.00%            | 4           | 0.48%            | 1           | 0.12%            | 2           | 0.25%            |
| <i>Streptococcus gallolyticus ssp pasteurianus</i> | 2           | 0.29%            | 1           | 0.14%            | 0           | 0.00%            | 2           | 0.23%            | 0           | 0.00%            |
| <i>Achromobacter denitrificans</i>                 | 1           | 0.14%            | 1           | 0.14%            | 2           | 0.24%            | 0           | 0.00%            | 0           | 0.00%            |
| <i>Aeromonas hydrophila</i>                        | 1           | 0.14%            | 1           | 0.14%            | 1           | 0.12%            | 0           | 0.00%            | 0           | 0.00%            |
| <i>Alcaligenes faecalis</i>                        | 1           | 0.14%            | 0           | 0.00%            | 0           | 0.00%            | 0           | 0.00%            | 0           | 0.00%            |
| <i>Enterococcus durans</i>                         | 1           | 0.14%            | 0           | 0.00%            | 1           | 0.12%            | 1           | 0.12%            | 1           | 0.12%            |
| <i>Enterococcus gallinarum</i>                     | 1           | 0.14%            | 0           | 0.00%            | 2           | 0.24%            | 0           | 0.00%            | 1           | 0.12%            |
| <i>Leclercia adacarboxylata</i>                    | 1           | 0.14%            | 0           | 0.00%            | 0           | 0.00%            | 0           | 0.00%            | 0           | 0.00%            |
| <i>Staphylococcus cohnii ssp cohnii</i>            | 1           | 0.14%            | 0           | 0.00%            | 0           | 0.00%            | 0           | 0.00%            | 0           | 0.00%            |
| <i>Staphylococcus cohnii ssp urealyticus</i>       | 1           | 0.14%            | 0           | 0.00%            | 0           | 0.00%            | 0           | 0.00%            | 1           | 0.12%            |
| <i>Staphylococcus lentus</i>                       | 1           | 0.14%            | 0           | 0.00%            | 2           | 0.24%            | 0           | 0.00%            | 1           | 0.12%            |
| <i>Staphylococcus saprophyticus</i>                | 1           | 0.14%            | 2           | 0.27%            | 1           | 0.12%            | 1           | 0.12%            | 2           | 0.25%            |
| <i>Streptococcus agalactiae</i>                    | 1           | 0.14%            | 2           | 0.27%            | 3           | 0.36%            | 0           | 0.00%            | 2           | 0.25%            |
| <i>Streptococcus gallolyticus</i>                  | 1           | 0.14%            | 1           | 0.14%            | 3           | 0.36%            | 13          | 1.50%            | 4           | 0.49%            |
| <i>Streptococcus sanguinis</i>                     | 1           | 0.14%            | 4           | 0.54%            | 2           | 0.24%            | 1           | 0.12%            | 4           | 0.49%            |
| <i>Achromobacter xylosoxidans</i>                  | 0           | 0.00%            | 0           | 0.00%            | 2           | 0.24%            | 0           | 0.00%            | 0           | 0.00%            |
| <i>Acinetobacter Iwoffii</i>                       | 0           | 0.00%            | 1           | 0.14%            | 0           | 0.00%            | 0           | 0.00%            | 0           | 0.00%            |
| <i>Aeromonas sobria</i>                            | 0           | 0.00%            | 0           | 0.00%            | 1           | 0.12%            | 0           | 0.00%            | 0           | 0.00%            |
| <i>Burkholderia cepacia</i>                        | 0           | 0.00%            | 1           | 0.14%            | 0           | 0.00%            | 0           | 0.00%            | 0           | 0.00%            |
| <i>Candida guilliermondii</i>                      | 0           | 0.00%            | 0           | 0.00%            | 1           | 0.12%            | 14          | 1.61%            | 0           | 0.00%            |
| <i>Candida norvegensis</i>                         | 0           | 0.00%            | 0           | 0.00%            | 1           | 0.12%            | 5           | 0.58%            | 0           | 0.00%            |
| <i>Citrobacter freundii</i>                        | 0           | 0.00%            | 1           | 0.14%            | 0           | 0.00%            | 1           | 0.12%            | 1           | 0.12%            |
| <i>Enterobacter cloacae</i>                        | 0           | 0.00%            | 0           | 0.00%            | 5           | 0.60%            | 0           | 0.00%            | 7           | 0.86%            |
| <i>Enterococcus casseliflavus</i>                  | 0           | 0.00%            | 0           | 0.00%            | 0           | 0.00%            | 0           | 0.00%            | 1           | 0.12%            |
| <i>Enterococcus hirae</i>                          | 0           | 0.00%            | 0           | 0.00%            | 1           | 0.12%            | 0           | 0.00%            | 0           | 0.00%            |
| <i>Klebsiella ssp ozaenae</i>                      | 0           | 0.00%            | 0           | 0.00%            | 2           | 0.24%            | 0           | 0.00%            | 67          | 8.25%            |
| <i>Pantoea agglomerans</i>                         | 0           | 0.00%            | 0           | 0.00%            | 2           | 0.24%            | 0           | 0.00%            | 0           | 0.00%            |
| <i>Pseudomonas putida</i>                          | 0           | 0.00%            | 1           | 0.14%            | 0           | 0.00%            | 0           | 0.00%            | 1           | 0.12%            |
| <i>Salmonella spp</i>                              | 0           | 0.00%            | 3           | 0.41%            | 3           | 0.36%            | 2           | 0.23%            | 2           | 0.25%            |
| <i>Serratia ficaria</i>                            | 0           | 0.00%            | 1           | 0.14%            | 2           | 0.24%            | 0           | 0.00%            | 0           | 0.00%            |
| <i>Serratia liquefaciens</i>                       | 0           | 0.00%            | 1           | 0.14%            | 2           | 0.24%            | 0           | 0.00%            | 2           | 0.25%            |
| <i>Sphingomonas paucimobilis</i>                   | 0           | 0.00%            | 1           | 0.14%            | 0           | 0.00%            | 0           | 0.00%            | 0           | 0.00%            |
| <i>Staphylococcus gallinarum</i>                   | 0           | 0.00%            | 3           | 0.41%            | 0           | 0.00%            | 0           | 0.00%            | 0           | 0.00%            |
| <i>Staphylococcus hyicus</i>                       | 0           | 0.00%            | 0           | 0.00%            | 1           | 0.12%            | 0           | 0.00%            | 0           | 0.00%            |
| <i>Staphylococcus intermedius</i>                  | 0           | 0.00%            | 0           | 0.00%            | 1           | 0.12%            | 0           | 0.00%            | 1           | 0.12%            |
| <i>Staphylococcus schleiferi</i>                   | 0           | 0.00%            | 1           | 0.14%            | 0           | 0.00%            | 0           | 0.00%            | 1           | 0.12%            |
| <i>Staphylococcus xylosum</i>                      | 0           | 0.00%            | 0           | 0.00%            | 0           | 0.00%            | 1           | 0.12%            | 1           | 0.12%            |
| <i>Streptococcus anginosus</i>                     | 0           | 0.00%            | 2           | 0.27%            | 1           | 0.12%            | 0           | 0.00%            | 0           | 0.00%            |
| <i>Streptococcus dysgalactiae ssp equisimilis</i>  | 0           | 0.00%            | 2           | 0.27%            | 0           | 0.00%            | 0           | 0.00%            | 0           | 0.00%            |
| <i>Streptococcus infantarius</i>                   | 0           | 0.00%            | 0           | 0.00%            | 1           | 0.12%            | 0           | 0.00%            | 0           | 0.00%            |
| <i>Streptococcus mutans</i>                        | 0           | 0.00%            | 0           | 0.00%            | 0           | 0.00%            | 2           | 0.23%            | 1           | 0.12%            |
| <i>Streptococcus parasanguinis</i>                 | 0           | 0.00%            | 1           | 0.14%            | 4           | 0.48%            | 1           | 0.12%            | 1           | 0.12%            |
| <i>Streptococcus pyogenes</i>                      | 0           | 0.00%            | 0           | 0.00%            | 1           | 0.12%            | 2           | 0.23%            | 1           | 0.12%            |
| <i>Streptococcus salivarius</i>                    | 0           | 0.00%            | 0           | 0.00%            | 1           | 0.12%            | 1           | 0.12%            | 0           | 0.00%            |
| <i>Yersinia frederiksenii</i>                      | 0           | 0.00%            | 0           | 0.00%            | 0           | 0.00%            | 2           | 0.23%            | 0           | 0.00%            |
